# Supplementary material for: pH-responsive polymeric nanoparticles with tunable sizes for targeted drug delivery
Source: Royal Society of Chemistry journal article supplement (doi:10.1039/c9ra10280a), 2020-01-01
Supplement: c9ra10280a1.pdf [file c9ra10280a1.pdf]

**Supporting Electronic Information (SEI):**

**pH-responsive Polymeric Nanoparticles with Tunable Sizes for Targeted  
Drug Delivery**

Mengle Kong <sup>a</sup>, Xinwen Peng <sup>a,b\*</sup>, Hao Cui <sup>a</sup>, Peiwen Liu <sup>b</sup>, Bo Pang <sup>b</sup>, Kai Zhang <sup>b\*</sup>

<sup>a</sup> College of Chemistry and Chemical Engineering, College of Life Science, Nanofiber Engineering Center of Jiangxi Province, Jiangxi Normal University, Nanchang, Jiangxi 330022, PR China

<sup>b</sup> Wood Technology and Wood Chemistry, Georg-August-University of Goettingen, Buesgenweg 4, 37077 Goettingen, Germany

\*Corresponding authors:

xinwenpeng@jxnu.edu.cn (Xinwen Peng)

kai.zhang@uni-goettingen.de (Kai Zhang)

### The calibrated plot

In the HPLC conditions (see Fig. S1), at concentrations of 0.02, 0.06, 0.08, 0.12, 0.16 and 0.2 mg mL<sup>-1</sup>, with a mobile phase of 0.002 mol L<sup>-1</sup> sodium acetate buffer solution (pH 4.3) at a flow rate of 0.7 ml min<sup>-1</sup>, and a mobile phase of methanol at a flow rate of 0.3 ml min<sup>-1</sup>, the calibrated plot shows a good correlation coefficient of 0.999. The R<sup>2</sup> obtained from 10 consecutive injections of each concentration is < 0.1.

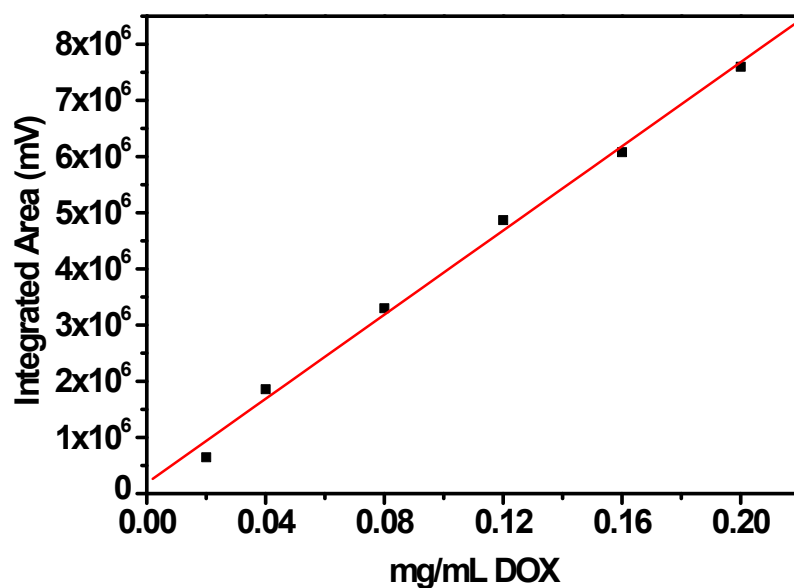

Fig. S1. The calibrated plot of DOX

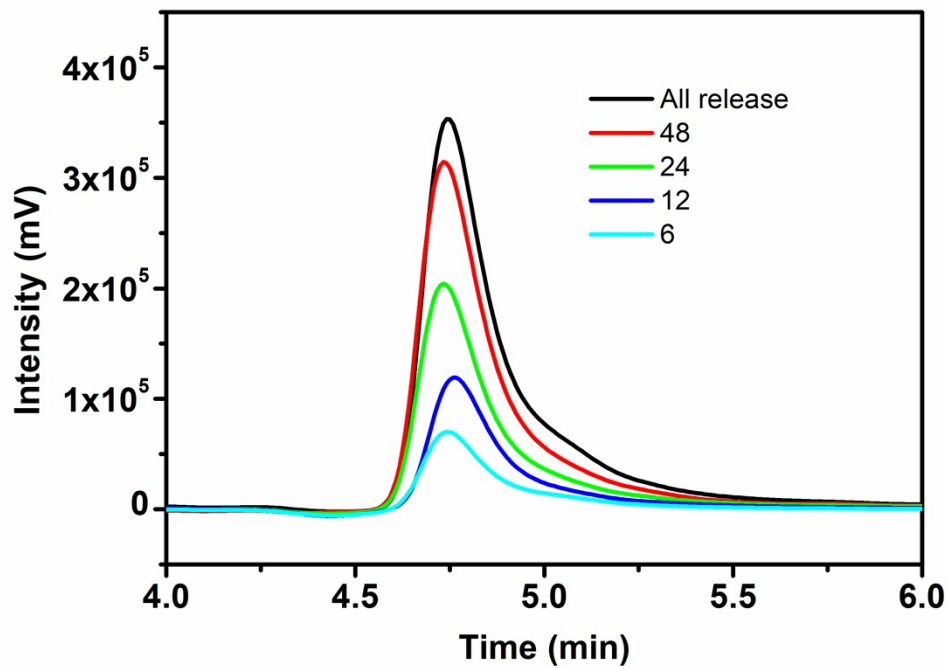

Fig. S2. Integrated areas of HPLC showing the release of DOX in aqueous solutions of pH 4.0 from NPs in permeable membrane bags after 6 h, 12 h, 24 h and 48 h.

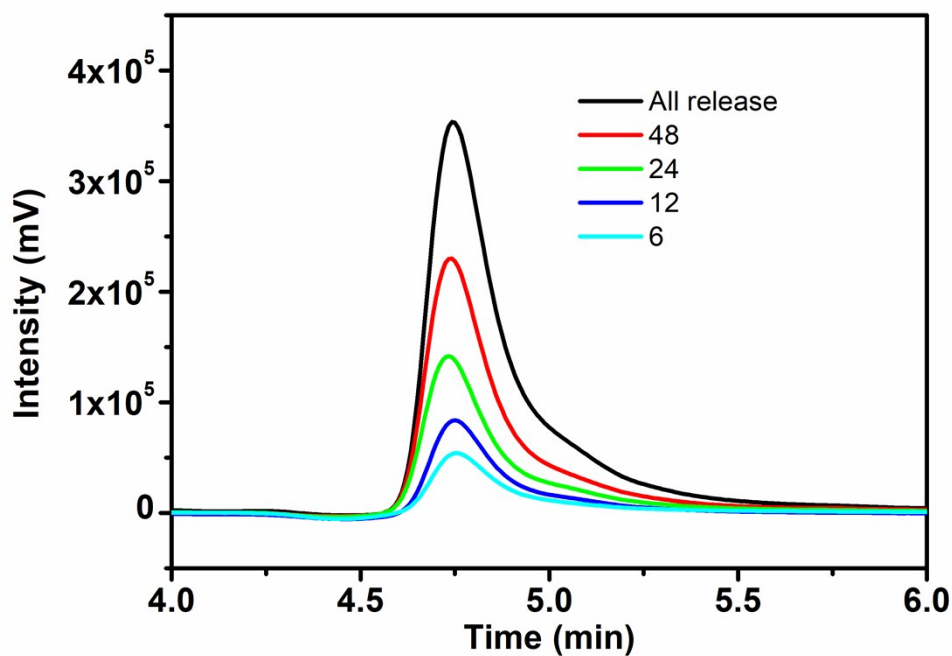

Fig. S3. Integrated areas of HPLC showing the release of DOX in aqueous solutions of pH 5.0 from NPs in permeable membrane bags after 6 h, 12 h, 24 h and 48 h.

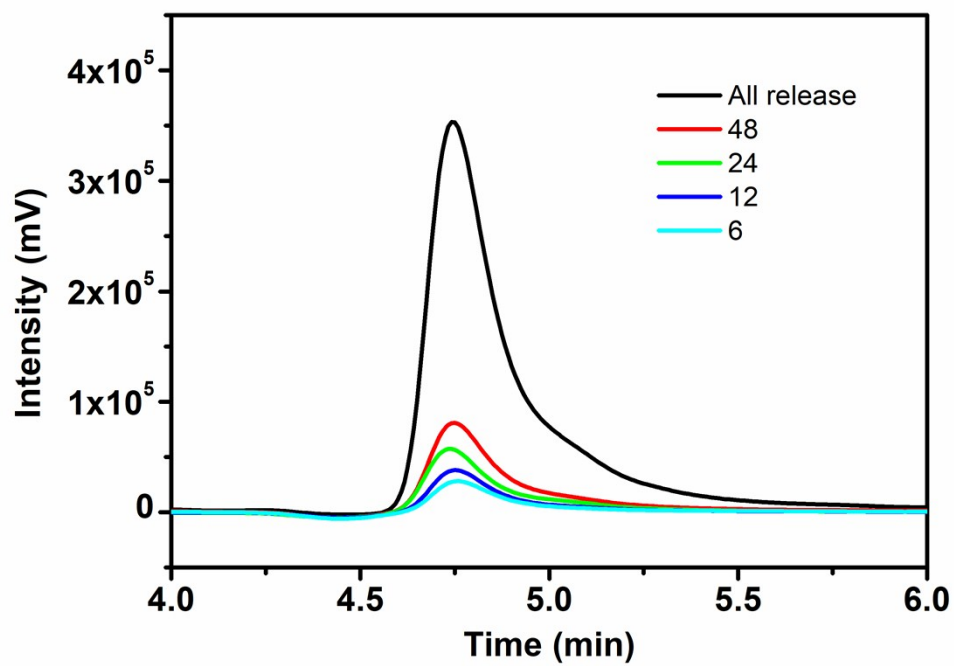

Fig. S4. Integrated areas of HPLC showing the release of DOX in aqueous solutions of pH 7.4 from NPs in permeable membrane bags after 6 h, 12 h, 24 h and 48 h.
